# Supplementary material for: Importance of Vaccination against SARS-CoV-2 in Patients with Interstitial Lung Disease Associated with Systemic Autoimmune Disease
Source: MDPI journal article supplement (doi:10.3390/jcm11092437), 2022-04-26
Supplement: s1 [file s1]

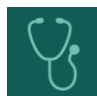

## Supplementary Materials

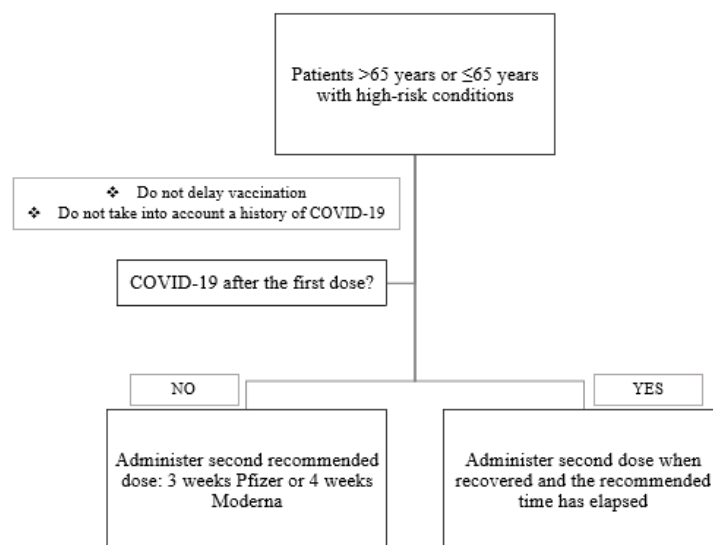

**Figure S1.** Guideline of vaccination COVID-19 in Andalusia, Spain, 2021.

**Table S1.** Different autoantibodies profiles in different patients with ILD-SAD.

| Variable                 | Total<br>(n=176) | Rheumatoid<br>Arthritis n =<br>105 | Systemic<br>Sclerosis n<br>= 49 | Inflammatory<br>Myopathy n =<br>22 |
|--------------------------|------------------|------------------------------------|---------------------------------|------------------------------------|
| Rheumatoid factor, n (%) | 104 (59.1)       | 101 (96.2)                         | 2 (4.1)                         | 1 (4.5)                            |
| ACPA (>20), n (%)        | 91 (51.7)        | 91 (86.7)                          | 0 (0.0)                         | 0 (0.0)                            |
| ANA, n (%)               | 88 (51.2)        | 24 (23.8)                          | 46 (93.9)                       | 18 (81.8)                          |
| Anti-Scl70, n (%)        | 30 (17.0)        | 0 (0.0)                            | 30 (61.2)                       | 0 (0.0)                            |
| Anticentromere, n (5)    | 8 (4.6)          | 0 (0.0)                            | 8 (16.3)                        | 0 (0.0)                            |
| PM-Scl, n (%)            | 3 (1.7)          | 0 (0.0)                            | 2 (4.1)                         | 1 (4.5)                            |
| Anti-RNP, n (%)          | 1 (0.6)          | 0 (0.0)                            | 1 (2.0)                         | 0 (0.0)                            |
| Anti-Ku, n (%)           | 1 (0.6)          | 0 (0.0)                            | 1 (2.0)                         | 0 (0.0)                            |
| RNA-polymerase 3, n (%)  | 1 (0.6)          | 0 (0.0)                            | 1 (2.0)                         | 0 (0.0)                            |
| Anti-Jo-1, n (%)         | 8 (4.6)          | 0 (0.0)                            | 0 (0.0)                         | 8 (36.3)                           |
| Anti-PL7, n (%)          | 5 (2.9)          | 0 (0.0)                            | 0 (0.0)                         | 5 (22.7)                           |
| Anti-EJ, n (%)           | 1 (0.6)          | 0 (0.0)                            | 0 (0.0)                         | 1 (4.5)                            |
| Anti-NMDA, n (%)         | 3 (1.7)          | 0 (0.0)                            | 0 (0.0)                         | 3 (13.6)                           |
| Anti-TIF, n (%)          | 2 (1.2)          | 0 (0.0)                            | 0 (0.0)                         | 2 (9.1)                            |
| Anti-SRP, n (%)          | 1 (0.6)          | 0 (0.0)                            | 0 (0.0)                         | 1 (4.5)                            |

Abbreviations; ILD: diffuse interstitial lung disease, SAD: systemic autoimmune disease.

**Table S2.** Factors associated with SARS-CoV-2 infection in 176 patients with ILD-SAD.

| Variable                                          | SARS-CoV-2 Infection<br>n=22 | No SARS-CoV-2 Infection<br>n=154 | p-Value |
|---------------------------------------------------|------------------------------|----------------------------------|---------|
| Female sex, n (%)                                 | 15 (68.2)                    | 102 (66.2)                       | 0.856   |
| Age in years, mean (SD)                           | 64.7 (11.1)                  | 62.4 (12.9)                      | 0.314   |
| Smoking status                                    |                              |                                  | 0.716   |
| Never smoked, n (%)                               | 14 (63.6)                    | 104 (67.5)                       |         |
| Smoked, n (%)                                     | 8 (36.4)                     | 50 (32.4)                        |         |
| Arterial hypertension, n (%)                      | 9 (40.9)                     | 43 (27.9)                        | 0.212   |
| Diabetes mellitus, n (%)                          | 4 (18.2)                     | 14 (9.1)                         | 0.188   |
| Obesity (BMI $\geq$ 30), n (%)                    | 7 (31.8)                     | 29 (18.8)                        | 0.158   |
| Time since diagnosis of SAD, months, median (IQR) | 135.4 (67.7-250.2)           | 130.1 (55.9-216.7)               | 0.658   |
| Time since diagnosis of ILD, months, median (IQR) | 80.9(48.5-114.1)             | 59.1 (28.5-97.1)                 | 0.041   |
| Radiological pattern                              |                              |                                  | 0.752   |
| NSIP, n (%)                                       | 10 (45.5)                    | 81 (52.6)                        |         |
| UIP n (%)                                         | 11 (50.0)                    | 64 (41.6)                        |         |
| Fibrotic NSIP, n (%)                              | 1 (4.5)                      | 9 (5.8)                          |         |
| Most recent PFT results                           |                              |                                  |         |
| FVC % predicted, mean (SD)                        | 63.9 (18.5)                  | 74.9 (19.8)                      | 0.015   |
| FEV1 % predicted, mean (SD)                       | 65.2 (17.4)                  | 76.8 (18.4)                      | 0.030   |
| DLCO-SB % predicted, mean (SD)                    | 51.9 (14.3)                  | 56.1 (16.5)                      | 0.045   |
| Treatments                                        |                              |                                  |         |
| csDMARDs, n (%)                                   | 12 (54.5)                    | 99 (64.3)                        | 0.376   |
| Methotrexate, n (%)                               | 5 (22.7)                     | 48 (31.2)                        | 0.419   |
| Leflunomide, n (%)                                | 3 (13.6)                     | 26 (16.9)                        | 0.701   |
| Sulfasalazine, n (%)                              | 2 (9.1)                      | 6 (3.9)                          | 0.274   |
| Hydroxychloroquine, n (%)                         | 3 (13.6)                     | 27 (17.5)                        | 0.649   |
| bDMARDs, n (%)                                    | 9 (40.9)                     | 58 (37.7)                        | 0.769   |
| Anti-TNF, n (%)                                   | 1 (4.5)                      | 7 (4.5)                          | 1.000   |
| Tocilizumab, n (%)                                | 0 (0.0)                      | 7 (4.5)                          | 0.307   |
| Abatacept, n (%)                                  | 2 (9.1)                      | 18 (11.7)                        | 0.720   |
| Rituximab, n (%)                                  | 7 (31.8)                     | 25 (16.0)                        | 0.040   |
| Immunosuppressants, n (%)                         | 11 (50.0)                    | 54 (35.0)                        | 0.176   |
| Mycophenolate, n (%)                              | 8 (36.4)                     | 40 (26.0)                        | 0.118   |
| Azathioprine, n (%)                               | 2 (9.1)                      | 12 (7.8)                         | 0.833   |

|                                                |                |               |       |
|------------------------------------------------|----------------|---------------|-------|
| Cyclophosphamide, n (%)                        | 1 (4.5)        | 2 (1.3)       | 0.271 |
| Antifibrotic, n (%)                            | 1 (4.5)        | 2 (1.3)       | 0.271 |
| Glucocorticoids, n (%)                         | 18 (81.8)      | 97 (63.0)     | 0.043 |
| Dose of glucocorticoids (mg/day), median (IQR) | 5.0 (5.0-10.0) | 5.0 (0.0-6.0) | 0.034 |
| Vaccinated, n (%)                              | 17 (77.3)      | 146 (94.8)    | 0.003 |

Abbreviations: ILD: diffuse interstitial lung disease, SAD: systemic autoimmune disease, BMI: body mass index; UIP: usual interstitial pneumonia, NSIP: nonspecific interstitial pneumonia, FVC: forced vital capacity, FEV1: forced expiratory volume in the first second, DLCO: diffusing capacity of the lung for carbon monoxide, csDMARD: conventional synthetic disease-modifying antirheumatic drug, bDMARD: biologic DMARD.

**Table S3.** Factors associated with the severity of SARS-CoV-2 infection in 176 patients with ILD-SAD.

| Variable                                          | Severe SARS-CoV-2 Infection n=7 | No Severe SARS-CoV-2 Infection n=169 | p-Value |
|---------------------------------------------------|---------------------------------|--------------------------------------|---------|
| Female sex, n (%)                                 | 3 (42.9)                        | 114 (67.5)                           | 0.177   |
| Age in years, mean (SD)                           | 66.2 (9.3)                      | 64.9 (12.8)                          | 0.635   |
| Smoking history                                   |                                 |                                      | 0.209   |
| Never smoked, n (%)                               | 4 (57.1)                        | 114 (67.5)                           |         |
| Smoked, n (%)                                     | 3 (42.9)                        | 55 (32.5)                            |         |
| Arterial hypertension, n (%)                      | 3 (42.9)                        | 49 (29.0)                            | 0.431   |
| Diabetes mellitus, n (%)                          | 4 (57.1)                        | 14 (8.3)                             | 0.001   |
| Obesity (BMI $\geq$ 30), n (%)                    | 4 (57.1)                        | 32 (18.9)                            | 0.020   |
| Time since diagnosis of SAD, months, median (IQR) | 135.4 (67.7-250.2)              | 130.1 (55.9-216.7)                   | 0.520   |
| Time since diagnosis of ILD, months, median (IQR) | 83.0 (33.4-130.1)               | 59.9 (28.6-88.8)                     | 0.056   |
| Radiological pattern                              |                                 |                                      | 0.356   |
| NSIP, n (%)                                       | 2 (28.6)                        | 89 (52.7)                            |         |
| UIP n (%)                                         | 4 (57.1)                        | 71 (42.0)                            |         |
| Fibrotic NSIP, n (%)                              | 1 (14.3)                        | 9 (5.3)                              |         |
| Most recent PFT results                           |                                 |                                      |         |
| FVC % predicted, mean (SD)                        | 62.5 (23.4)                     | 75.9 (19.7)                          | 0.022   |
| FEV1 % predicted, mean (SD)                       | 64.9 (12.3)                     | 74.1 (19.7)                          | 0.043   |
| DLCO-SB % predicted, mean (SD)                    | 50.9 (18.1)                     | 55.7 (16.3)                          | 0.049   |
| Treatments                                        |                                 |                                      |         |
| csDMARDs, n (%)                                   | 5 (71.4)                        | 106 (62.7)                           | 0.640   |
| Methotrexate, n (%)                               | 2 (28.6)                        | 51 (30.2)                            | 0.928   |
| Leflunomide, n (%)                                | 2 (28.6)                        | 27 (16.0)                            | 0.379   |
| Sulfasalazine, n (%)                              | 0 (0.0)                         | 8 (4.7)                              | 0.556   |

|                                             |                |               |        |
|---------------------------------------------|----------------|---------------|--------|
| Hydroxychloroquine, n (%)                   | 2 (28.6)       | 28 (16.6)     | 0.408  |
| bDMARDs, n (%)                              | 4 (57.1)       | 63 (37.3)     | 0.289  |
| Anti-TNF agents, n (%)                      | 0 (0.0)        | 8 (4.7)       | 0.556  |
| Tocilizumab, n (%)                          | 0 (0.0)        | 7 (4.1)       | 0.583  |
| Abatacept, n (%)                            | 2 (28.6)       | 18 (10.7)     | 0.143  |
| Rituximab, n (%)                            | 3 (42.9)       | 29 (17.2)     | 0.048  |
| Immunosuppressants, n (%)                   | 2 (28.6)       | 63 (37.3)     | 0.640  |
| Mycophenolate, n (%)                        | 2 (28.6)       | 46 (27.2)     | 0.937  |
| Azathioprine, n (%)                         | 0 (0.0)        | 14 (8.3)      | 0.427  |
| Cyclophosphamide, n (%)                     | 0 (0.0)        | 3 (1.8)       | 0.722  |
| Antifibrotic, n (%)                         | 1 (14.3)       | 2 (1.2)       | 0.115  |
| Glucocorticoids, n (%)                      | 7 (100.0)      | 108 (63.9)    | 0.036  |
| Glucocorticoids dose (mg/day), median (IQR) | 6.2 (5.0-11.2) | 5.0 (0.0-7.5) | 0.039  |
| Vaccinated, n (%)                           | 2 (28.6)       | 161 (95.3)    | <0.001 |

Abbreviations: ILD: diffuse interstitial lung disease, SAD: systemic autoimmune disease, BMI: body mass index; UIP: usual interstitial pneumonia, NSIP: nonspecific interstitial pneumonia, FVC: forced vital capacity, FEV1: forced expiratory volume in the first second, DLCO: diffusing capacity of the lung for carbon monoxide, csDMARD: conventional synthetic disease-modifying antirheumatic drug, bDMARD, biologic DMARD.

**Table S4.** Multivariate analysis of factors associated with severe SARS-CoV2 infection in patients with ILD-SAD and SARS-CoV2 infection.

| Variable                     | Severe SARS-CoV-2 Infection n = 7 | No severe SARS-CoV-2 Infection n = 22 | p-Value |
|------------------------------|-----------------------------------|---------------------------------------|---------|
| Female sex, n (%)            | 3 (42.9)                          | 15 (68.2)                             | 0.107   |
| Age in years, mean (SD)      | 66.2 (9.3)                        | 64.7 (11.7)                           | 0.677   |
| Smoking history              |                                   |                                       | 0.349   |
| Never smoked, n (%)          | 4 (57.1)                          | 11 (50.0)                             |         |
| Smoked, n (%)                | 3 (42.9)                          | 11 (50.0)                             |         |
| Arterial hypertension, n (%) | 3 (42.9)                          | 9 (40.9)                              | 0.899   |
| Diabetes mellitus, n (%)     | 4 (57.1)                          | 4 (18.2)                              | 0.015   |
| Obesity (BMI≥30), n (%)      | 4 (57.1)                          | 7 (31.8)                              | 0.107   |
| Type of ILD-SAD              |                                   |                                       | 0.060   |
| Rheumatoid arthritis, n (%)  | 7 (100.0)                         | 14 (63.6)                             |         |
| Systemic sclerosis, n (%)    | 0 (0.0)                           | 4 (18.2)                              |         |
| Inflammatory myopathy, n (%) | 0 (0.0)                           | 4 (18.2)                              |         |

|                                                   |                    |                    |        |
|---------------------------------------------------|--------------------|--------------------|--------|
| Time since diagnosis of SAD, months, median (IQR) | 135.4 (67.7-250.2) | 134.4 (67.7-257.7) | 0.859  |
| Time since diagnosis of ILD, months, median (IQR) | 83.0 (33.4-130.1)  | 80.9 (48.5-114.1)  | 0.880  |
| Radiological pattern                              |                    |                    | 0.647  |
| NSIP, n (%)                                       | 2 (28.6)           | 10 (45.5)          |        |
| UIP n (%)                                         | 4 (57.1)           | 11 (50.0)          |        |
| Fibrotic NSIP, n (%)                              | 1 (14.3)           | 1 (4.5)            |        |
| Most recent PFT results                           |                    |                    |        |
| FVC % predicted, mean (SD)                        | 62.5 (23.4)        | 63.9 (18.5)        | 0.644  |
| FEV1 % predicted, mean (SD)                       | 64.9 (12.3)        | 65.2 (17.4)        | 0.972  |
| DLCO-SB % predicted, mean (SD)                    | 50.9 (18.1)        | 51.9 (14.3)        | 0.584  |
| Treatments                                        |                    |                    |        |
| csDMARDs, n (%)                                   | 5 (71.4)           | 12 (54.5)          | 0.277  |
| Methotrexate, n (%)                               | 2 (28.6)           | 5 (22.7)           | 0.655  |
| Leflunomide, n (%)                                | 2 (28.6)           | 3 (13.6)           | 0.163  |
| Sulfasalazine, n (%)                              | 0 (0.0)            | 2 (9.1)            | 0.311  |
| Hydroxychloroquine, n (%)                         | 2 (28.6)           | 3 (18.6)           | 0.163  |
| bDMARDs, n (%)                                    | 4 (57.1)           | 9 (40.9)           | 0.290  |
| Anti-TNF agents, n (%)                            | 0 (0.0)            | 0 (0.0)            | 1.000  |
| Tocilizumab, n (%)                                | 0 (0.0)            | 0 (0.0)            | 1.000  |
| Abatacept, n (%)                                  | 2 (28.6)           | 2 (9.1)            | 0.091  |
| Rituximab, n (%)                                  | 3 (42.9)           | 7 (31.8)           | 0.448  |
| Immunosuppressants, n (%)                         | 2 (28.6)           | 10 (45.5)          | 0.277  |
| Mycophenolate, n (%)                              | 2 (28.6)           | 6 (27.3)           | 0.350  |
| Azathioprine, n (%)                               | 0 (0.0)            | 2 (9.1)            | 0.311  |
| Cyclophosphamide, n (%)                           | 0 (0.0)            | 1 (4.5)            | 0.484  |
| Antifibrotic, n (%)                               | 1 (14.3)           | 1 (4.5)            | 0.134  |
| Glucocorticoids, n (%)                            | 7 (100.0)          | 18 (81.8)          | 0.187  |
| Glucocorticoids dose (mg/day), median (IQR)       | 6.2 (5.0-11.2)     | 5.0 (5.0-10.0)     | 0.569  |
| Vaccinated, n (%)                                 | 2 (28.6)           | 17 (77.3)          | <0.001 |

---

Abbreviations: **ILD**: diffuse interstitial lung disease, **SAD**: systemic autoimmune disease, **BMI**: body mass index; **UIP**: usual interstitial pneumonia, **NSIP**: nonspecific interstitial pneumonia, **FVC**: forced vital capacity, **FEV1**: forced expiratory volume in the first second, **DLCO**: diffusing capacity of the lung for carbon monoxide, **csDMARD**: conventional synthetic disease-modifying antirheumatic drug, **bDMARD**, biologic DMARD.
